# Supplementary material
Source: publisher figshare collection journal article supplement (https://plos.figshare.com/articles/dataset/_/1429679)
Supplement: Supplementary file [file 1]

| peak<br>number <sup>1</sup> | nearby gene(s) <sup>2</sup>                 | peak<br>summit <sup>3</sup> | number of<br>DnaA<br>boxes <sup>4</sup> | peak<br>amplitude at<br>1.4 $\mu$ M DnaA <sup>5</sup> | peak<br>amplitude at<br>4.1 $\mu$ M DnaA <sup>5</sup> | K <sub>d</sub> ( $\mu$ M)<br>(ATP-DnaA-<br>His) <sup>6</sup> | K <sub>d</sub> ( $\mu$ M)<br>(ADP-DnaA-<br>His) <sup>6</sup> |
|-----------------------------|---------------------------------------------|-----------------------------|-----------------------------------------|-------------------------------------------------------|-------------------------------------------------------|--------------------------------------------------------------|--------------------------------------------------------------|
| 1                           | upstream of rpmH; upstream of dnaA          | 150                         | 12                                      | 0.92                                                  | 0.70                                                  | 0.21                                                         | 0.33                                                         |
| 2                           | downstream of dnaA; upstream of dnaN        | 1841                        | 8                                       | 0.59                                                  | 0.55                                                  | 0.16                                                         | 0.30                                                         |
| 3                           | upstream of ywcl; upstream of vpr           | 3885674                     | 11                                      | 1.00                                                  | 0.72                                                  | 0.13                                                         | 0.17                                                         |
| 4                           | downstream of gcp; downstream of ydiF       | 627955                      | 10                                      | 0.96                                                  | 0.72                                                  | 0.15                                                         | 0.33                                                         |
| 5                           | upstream of trmE; downstream of jag         | 4191071                     | 4                                       | 0.96                                                  | 0.66                                                  | 0.33                                                         | 0.43                                                         |
| 6                           | upstream of ywlC; downstream of ywlB        | 3772105                     | 9                                       | 0.85                                                  | 0.67                                                  | 0.25                                                         | 0.45                                                         |
| 7                           | upstream of yqeG; upstream of sda           | 2620051                     | 8                                       | 0.71                                                  | 0.61                                                  | 0.15                                                         | 0.51                                                         |
| 8                           | upstream of yydA; downstream of yyzF        | 4113012                     | 7                                       | 0.64                                                  | 0.62                                                  | 0.16                                                         | 0.33                                                         |
| 9                           | inside codV                                 | 1670814                     | 4                                       | 0.34                                                  | 0.48                                                  | 1.1                                                          | 1.9                                                          |
| 10                          | inside rplB                                 | 137727                      | 2                                       | 0.28                                                  | 0.46                                                  | 1.4                                                          | 1.2                                                          |
| 11                          | downstream of ynal; upstream of xynP        | 1870622                     | 3                                       | 0.12                                                  | 0.39                                                  | 2.0                                                          | 3.0                                                          |
| 12                          | inside yhcA                                 | 962763                      | 3                                       | 0.11                                                  | 0.35                                                  | 3.6                                                          | 2.8                                                          |
| 13                          | inside yorF                                 | 2158839                     | 3                                       | 0.11                                                  | 0.39                                                  | 2.0                                                          | 3.0                                                          |
| 14                          | upstream of yvmC; upstream of yvmB          | 3582878                     | 2                                       | 0.084                                                 | 0.43                                                  | 2.2                                                          | 4.4                                                          |
| 15                          | inside yhcN                                 | 972751                      | 3                                       | 0.083                                                 | 0.20                                                  | 19                                                           | 6.9                                                          |
| 16                          | inside yutJ                                 | 3287547                     | 5                                       | 0.074                                                 | 0.35                                                  | 2.5                                                          | 2.9                                                          |
| 17                          | inside yydH                                 | 4104262                     | 3                                       | 0.073                                                 | 0.41                                                  | 2.4                                                          | 4.6                                                          |
| 18                          | inside ggaA                                 | 3648588                     | 4                                       | 0.068                                                 | 0.40                                                  | 2.7                                                          | 4.8                                                          |
| 19                          | inside yopH                                 | 2184371                     | 2                                       | 0.063                                                 | 0.35                                                  | 4.9                                                          | 5.0                                                          |
| 20                          | inside rlmCD                                | 722497                      | 3                                       | 0.060                                                 | 0.23                                                  | 7.5                                                          | 6.7                                                          |
| 21                          | upstream of xylR; upstream of xylA          | 1875249                     | 4                                       | 0.055                                                 | 0.29                                                  | 5.5                                                          | 5.8                                                          |
| 22                          | inside pheT                                 | 2901978                     | 2                                       | 0.051                                                 | 0.27                                                  | 3.1                                                          | 5.7                                                          |
| 23                          | inside yokD                                 | 2254843                     | 3                                       | 0.047                                                 | 0.33                                                  | 4.8                                                          | 5.0                                                          |
| 24                          | upstream of yjdB; upstream of manR          | 1253820                     | 5                                       | 0.047                                                 | 0.31                                                  | 3.5                                                          | 5.6                                                          |
| 25                          | inside yozL                                 | 2037328                     | 5                                       | 0.046                                                 | 0.30                                                  | 5.2                                                          | 5.2                                                          |
| 26                          | inside sunT                                 | 2242095                     | 4                                       | 0.046                                                 | 0.33                                                  | 3.0                                                          | 5.2                                                          |
| 27                          | inside leuB                                 | 2864218                     | 2                                       | 0.042                                                 | 0.27                                                  | 3.9                                                          | 5.6                                                          |
| 28                          | upstream of yqbD; downstream of yqbC        | 2657896                     | 4                                       | 0.041                                                 | 0.29                                                  | 3.3                                                          | 5.5                                                          |
| 29                          | upstream of atpI; downstream of upp         | 3766390                     | 1                                       | 0.038                                                 | 0.26                                                  | 5.9                                                          | 6.1                                                          |
| 30                          | upstream of tuaA_pseudo; downstream of lytC | 3637063                     | 3                                       | 0.037                                                 | 0.29                                                  | 5.3                                                          | 5.8                                                          |
| 31                          | inside yddR                                 | 537736                      | 4                                       | 0.036                                                 | 0.31                                                  | 5.0                                                          | 5.4                                                          |
| 32                          | inside dltA                                 | 3931019                     | 4                                       | 0.034                                                 | 0.25                                                  | 5.9                                                          | 6.1                                                          |
| 33                          | inside sdpl                                 | 3444830                     | 4                                       | 0.033                                                 | 0.34                                                  |                                                              |                                                              |
| 34                          | inside yomG                                 | 2231138                     | 4                                       | 0.032                                                 | 0.30                                                  | 5.0                                                          | 5.6                                                          |
| 35                          | inside yydI                                 | 4103032                     | 2                                       | 0.031                                                 | 0.35                                                  |                                                              |                                                              |
| 36                          | inside yobM                                 | 2046975                     | 4                                       | 0.030                                                 | 0.28                                                  | 5.3                                                          | 5.6                                                          |
| 37                          | inside int                                  | 513492                      | 2                                       | 0.027                                                 | 0.30                                                  |                                                              |                                                              |
| 38                          | inside yhdF                                 | 1006129                     | 4                                       | 0.026                                                 | 0.18                                                  | 7.8                                                          | 6.9                                                          |
| 39                          | upstream of yoaG; upstream of BSUB_01999    | 2001384                     | 2                                       | 0.024                                                 | 0.25                                                  | 5.7                                                          | 6.2                                                          |
| 40                          | inside thiL                                 | 624773                      | 2                                       | 0.023                                                 | 0.29                                                  |                                                              |                                                              |
| 41                          | inside mtbP                                 | 2144181                     | 3                                       | 0.023                                                 | 0.27                                                  |                                                              |                                                              |
| 42                          | inside yusY_pseudo                          | 3360154                     | 2                                       | 0.021                                                 | 0.19                                                  | 6.9                                                          | 6.7                                                          |
| 43                          | inside guaC                                 | 3282045                     | 3                                       | 0.021                                                 | 0.24                                                  |                                                              |                                                              |
| 44                          | inside yyaB                                 | 4185827                     | 4                                       | 0.021                                                 | 0.25                                                  | 5.5                                                          | 5.9                                                          |
| 45                          | inside vpr                                  | 3887160                     | 2                                       | 0.020                                                 | 0.21                                                  | 6.4                                                          | 6.0                                                          |
| 46                          | upstream of yrkD; downstream of yrkC        | 2687367                     | 3                                       | 0.020                                                 | 0.27                                                  |                                                              |                                                              |
| 47                          | inside yobH_pseudo                          | 2036906                     | 4                                       | 0.019                                                 | 0.22                                                  |                                                              |                                                              |
| 48                          | inside yezG                                 | 730934                      | 1                                       | 0.019                                                 | 0.24                                                  |                                                              |                                                              |
| 49                          | inside yhfW                                 | 1098759                     | 4                                       | 0.018                                                 | 0.22                                                  |                                                              |                                                              |
| 50                          | downstream of ylaN; upstream of ftsW        | 1536262                     | 3                                       | 0.018                                                 | 0.20                                                  | 6.4                                                          | 7.2                                                          |
| 51                          | inside pckA                                 | 3107604                     | 3                                       | 0.018                                                 | 0.24                                                  |                                                              |                                                              |
| 52                          | inside skfC                                 | 216239                      | 3                                       | 0.018                                                 | 0.21                                                  |                                                              |                                                              |
| 53                          | inside yrrT                                 | 2760639                     | 3                                       | 0.017                                                 | 0.26                                                  |                                                              |                                                              |
| 54                          | downstream of yoaM; downstream of yozS      | 2009825                     | 2                                       | 0.017                                                 | 0.15                                                  |                                                              |                                                              |
| 55                          | inside ywhK                                 | 3822988                     | 2                                       | 0.017                                                 | 0.30                                                  | 4.9                                                          | 5.2                                                          |
| 56                          | inside yobI                                 | 2040611                     | 3                                       | 0.017                                                 | 0.23                                                  |                                                              |                                                              |

| peak<br>number <sup>1</sup> | nearby gene(s) <sup>2</sup>                | peak<br>summit <sup>3</sup> | number of<br>DnaA<br>boxes <sup>4</sup> | peak<br>amplitude at<br>1.4 $\mu$ M DnaA <sup>5</sup> | peak<br>amplitude at<br>4.1 $\mu$ M DnaA <sup>5</sup> | K <sub>d</sub> ( $\mu$ M)<br>(ATP-DnaA-<br>His) <sup>6</sup> | K <sub>d</sub> ( $\mu$ M)<br>(ADP-DnaA-<br>His) <sup>6</sup> |
|-----------------------------|--------------------------------------------|-----------------------------|-----------------------------------------|-------------------------------------------------------|-------------------------------------------------------|--------------------------------------------------------------|--------------------------------------------------------------|
| 57                          | upstream of ysoA; downstream of leuD       | 2861591                     | 3                                       | 0.016                                                 | 0.16                                                  |                                                              |                                                              |
| 58                          | inside yydB                                | 4112070                     | 2                                       | 0.016                                                 | 0.22                                                  |                                                              |                                                              |
| 59                          | inside rnr                                 | 3431116                     | 2                                       | 0.015                                                 | 0.23                                                  |                                                              |                                                              |
| 60                          | inside yoqI                                | 2170853                     | 3                                       | 0.015                                                 | 0.20                                                  |                                                              |                                                              |
| 61                          | inside yfhP                                | 918710                      | 4                                       | 0.014                                                 | 0.22                                                  |                                                              |                                                              |
| 62                          | inside maeN                                | 3222860                     | 2                                       | 0.014                                                 | 0.22                                                  |                                                              |                                                              |
| 63                          | inside yclE                                | 416076                      | 3                                       | 0.014                                                 | 0.23                                                  |                                                              |                                                              |
| 64                          | downstream of glmS; upstream of BSUB_00228 | 202088                      | 2                                       | 0.014                                                 | 0.24                                                  |                                                              |                                                              |
| 65                          | inside yoqG                                | 2171732                     | 3                                       | 0.014                                                 | 0.19                                                  |                                                              |                                                              |
| 66                          | inside ydiR                                | 643948                      | 4                                       | 0.014                                                 | 0.23                                                  |                                                              |                                                              |
| 67                          | inside ggaB                                | 3645388                     | 2                                       | 0.014                                                 | 0.17                                                  |                                                              |                                                              |
| 68                          | inside yeaA                                | 666717                      | 4                                       | 0.013                                                 | 0.16                                                  |                                                              |                                                              |
| 69                          | upstream of yobI; downstream of yobJ       | 2042455                     | 4                                       | 0.013                                                 | 0.17                                                  |                                                              |                                                              |
| 70                          | downstream of yomP; upstream of yomO       | 2216984                     | 2                                       | 0.013                                                 | 0.20                                                  |                                                              |                                                              |
| 71                          | inside thyA                                | 1886564                     | 4                                       | 0.013                                                 | 0.23                                                  |                                                              |                                                              |
| 72                          | inside ydeD                                | 546380                      | 4                                       | 0.013                                                 | 0.22                                                  | 5.7                                                          | 6.3                                                          |
| 73                          | upstream of metE; downstream of ispA       | 1369518                     | 4                                       | 0.013                                                 | 0.17                                                  |                                                              |                                                              |
| 74                          | inside yomH                                | 2229315                     | 4                                       | 0.012                                                 | 0.23                                                  |                                                              |                                                              |
| 75                          | inside comP                                | 3233626                     | 4                                       | 0.012                                                 | 0.23                                                  |                                                              |                                                              |
| 76                          | inside yomY                                | 2211150                     | 3                                       | 0.011                                                 | 0.20                                                  |                                                              |                                                              |
| 77                          | upstream of ilvB; upstream of ysnD         | 2870093                     | 2                                       | 0.011                                                 | 0.22                                                  |                                                              |                                                              |
| 78                          | downstream of pksC; upstream of pksD       | 1768569                     | 4                                       | 0.011                                                 | 0.14                                                  |                                                              |                                                              |
| 79                          | downstream of yjcO; upstream of yjcP       | 1250077                     | 2                                       | 0.011                                                 | 0.14                                                  |                                                              |                                                              |
| 80                          | inside yeeB                                | 727961                      | 2                                       | 0.011                                                 | 0.19                                                  |                                                              |                                                              |
| 81                          | inside ydJA                                | 646424                      | 4                                       | 0.011                                                 | 0.19                                                  |                                                              |                                                              |
| 82                          | upstream of yptA; upstream of ypzG         | 2302570                     | 3                                       | 0.010                                                 | 0.18                                                  |                                                              |                                                              |
| 83                          | inside ymaB                                | 1856243                     | 2                                       | 0.010                                                 | 0.16                                                  |                                                              |                                                              |
| 84                          | inside yodD                                | 2244449                     | 5                                       | 0.010                                                 | 0.16                                                  |                                                              |                                                              |
| 85                          | upstream of yoeA; upstream of iseA         | 1975298                     | 3                                       | 0.010                                                 | 0.14                                                  |                                                              |                                                              |
| 86                          | inside ywcD                                | 3900266                     | 3                                       | 0.010                                                 | 0.15                                                  |                                                              |                                                              |
| 87                          | inside yrkK                                | 2681881                     | 3                                       | 0.010                                                 | 0.19                                                  |                                                              |                                                              |
| 88                          | inside gutB                                | 651061                      | 4                                       | 0.0098                                                | 0.19                                                  |                                                              |                                                              |
| 89                          | inside yddG                                | 526341                      | 4                                       | 0.0098                                                | 0.19                                                  |                                                              |                                                              |
| 90                          | inside yybL                                | 4152785                     | 3                                       | 0.0097                                                | 0.15                                                  |                                                              |                                                              |
| 91                          | upstream of arsR; downstream of yqcl       | 2630717                     | 3                                       | 0.0096                                                | 0.14                                                  |                                                              |                                                              |
| 92                          | downstream of ybzH; upstream of ybcL       | 211810                      | 2                                       | 0.0095                                                | 0.17                                                  |                                                              |                                                              |
| 93                          | downstream of cspC; downstream of ydeB     | 543306                      | 2                                       | 0.0095                                                | 0.16                                                  |                                                              |                                                              |
| 94                          | inside putP                                | 347627                      | 3                                       | 0.0094                                                | 0.19                                                  |                                                              |                                                              |
| 95                          | inside Tn917_MLS_leader                    | 2946908                     | 4                                       | 0.0093                                                | 0.14                                                  |                                                              |                                                              |
| 96                          | upstream of ydJ; upstream of iolT          | 659785                      | 1                                       | 0.0093                                                | 0.17                                                  |                                                              |                                                              |
| 97                          | inside yddN                                | 533833                      | 3                                       | 0.0091                                                | 0.16                                                  |                                                              |                                                              |
| 98                          | inside ydfS                                | 585223                      | 4                                       | 0.0089                                                | 0.18                                                  |                                                              |                                                              |
| 99                          | upstream of tig; downstream of ysoA        | 2860502                     | 2                                       | 0.0088                                                | 0.14                                                  |                                                              |                                                              |
| 100                         | inside lytD                                | 3664577                     | 1                                       | 0.0086                                                | 0.13                                                  |                                                              |                                                              |
| 101                         | upstream of speA; upstream of yktA         | 1519330                     | 2                                       | 0.0086                                                | 0.16                                                  |                                                              |                                                              |
| 102                         | upstream of cccA; downstream of sigA       | 2572767                     | 1                                       | 0.0086                                                | 0.13                                                  |                                                              |                                                              |
| 103                         | inside tagB                                | 3661157                     | 2                                       | 0.0085                                                | 0.16                                                  |                                                              |                                                              |
| 104                         | inside hemAT                               | 1096402                     | 3                                       | 0.0084                                                | 0.12                                                  |                                                              |                                                              |
| 105                         | inside BSUB_03753                          | 3599666                     | 3                                       | 0.0084                                                | 0.20                                                  |                                                              |                                                              |
| 106                         | inside ylcC                                | 1657468                     | 3                                       | 0.0083                                                | 0.17                                                  |                                                              |                                                              |
| 107                         | downstream of ynaC; upstream of ynaD       | 1866593                     | 4                                       | 0.0081                                                | 0.18                                                  |                                                              |                                                              |
| 108                         | downstream of yrpC; upstream of yrpD       | 2711970                     | 1                                       | 0.0081                                                | 0.16                                                  |                                                              |                                                              |
| 109                         | inside yydC                                | 4110647                     | 4                                       | 0.0081                                                | 0.15                                                  |                                                              |                                                              |
| 110                         | inside yunB                                | 3300980                     | 4                                       | 0.0079                                                | 0.088                                                 |                                                              |                                                              |
| 111                         | inside yxiD                                | 4015025                     | 1                                       | 0.0079                                                | 0.15                                                  |                                                              |                                                              |
| 112                         | downstream of ybxB; upstream of rpoB       | 121720                      | 1                                       | 0.0079                                                | 0.14                                                  |                                                              |                                                              |

| peak<br>number <sup>1</sup> | nearby gene(s) <sup>2</sup>                   | peak<br>summit <sup>3</sup> | number of<br>DnaA<br>boxes <sup>4</sup> | peak<br>amplitude at<br>1.4 $\mu$ M DnaA <sup>5</sup> | peak<br>amplitude at<br>4.1 $\mu$ M DnaA <sup>5</sup> | K <sub>d</sub> ( $\mu$ M)<br>(ATP-DnaA-<br>His) <sup>6</sup> | K <sub>d</sub> ( $\mu$ M)<br>(ADP-DnaA-<br>His) <sup>6</sup> |
|-----------------------------|-----------------------------------------------|-----------------------------|-----------------------------------------|-------------------------------------------------------|-------------------------------------------------------|--------------------------------------------------------------|--------------------------------------------------------------|
| 113                         | inside tagA                                   | 3659423                     | 5                                       | 0.0078                                                | 0.13                                                  |                                                              |                                                              |
| 114                         | inside comEC                                  | 2611312                     | 4                                       | 0.0076                                                | 0.16                                                  |                                                              |                                                              |
| 115                         | inside tagC                                   | 3662155                     | 6                                       | 0.0075                                                | 0.17                                                  |                                                              |                                                              |
| 116                         | inside sdpB                                   | 3442867                     | 2                                       | 0.0075                                                | 0.14                                                  |                                                              |                                                              |
| 117                         | inside yotB                                   | 2128318                     | 3                                       | 0.0074                                                | 0.16                                                  |                                                              |                                                              |
| 118                         | upstream of ydeE; upstream of ydeF            | 548120                      | 2                                       | 0.0074                                                | 0.13                                                  |                                                              |                                                              |
| 119                         | inside yacL                                   | 108737                      | 4                                       | 0.0073                                                | 0.17                                                  |                                                              |                                                              |
| 120                         | downstream of yqgB; downstream of yqgA        | 2560642                     | 3                                       | 0.0072                                                | 0.11                                                  |                                                              |                                                              |
| 121                         | inside yopK                                   | 2182576                     | 1                                       | 0.0072                                                | 0.063                                                 |                                                              |                                                              |
| 122                         | upstream of ydhU_pseudo; upstream of trnE-Arg | 618522                      | 3                                       | 0.0071                                                | 0.12                                                  |                                                              |                                                              |
| 123                         | inside yonH                                   | 2202195                     | 2                                       | 0.0070                                                | 0.12                                                  |                                                              |                                                              |
| 124                         | inside ypmA                                   | 2322241                     | 2                                       | 0.0070                                                | 0.081                                                 |                                                              |                                                              |
| 125                         | inside yyaP                                   | 4165129                     | 2                                       | 0.0070                                                | 0.14                                                  |                                                              |                                                              |
| 126                         | inside ywfH                                   | 3845978                     | 4                                       | 0.0069                                                | 0.15                                                  |                                                              |                                                              |
| 127                         | upstream of ynfC; upstream of alsT            | 1922157                     | 3                                       | 0.0069                                                | 0.15                                                  |                                                              |                                                              |
| 128                         | upstream of czcD; downstream of yrdN          | 2697762                     | 4                                       | 0.0069                                                | 0.17                                                  |                                                              |                                                              |
| 129                         | upstream of yonR; upstream of yonP            | 2194309                     | 3                                       | 0.0069                                                | 0.14                                                  |                                                              |                                                              |
| 130                         | inside xkdO                                   | 1320733                     | 4                                       | 0.0068                                                | 0.16                                                  |                                                              |                                                              |
| 131                         | upstream of yrdB; downstream of yrdA          | 2707146                     | 1                                       | 0.0068                                                | 0.036                                                 | 32                                                           | 29                                                           |
| 132                         | downstream of malR; upstream of nupN          | 3217564                     | 2                                       | 0.0068                                                | 0.13                                                  |                                                              |                                                              |
| 133                         | upstream of slp; upstream of BSUB_01591       | 1517608                     | 1                                       | 0.0067                                                | 0.10                                                  |                                                              |                                                              |
| 134                         | inside yhdP                                   | 1016193                     | 3                                       | 0.0066                                                | 0.13                                                  |                                                              |                                                              |
| 135                         | inside ppsB                                   | 1956283                     | 3                                       | 0.0065                                                | 0.089                                                 |                                                              |                                                              |
| 136                         | inside arsB                                   | 2629498                     | 3                                       | 0.0064                                                | 0.18                                                  |                                                              |                                                              |
| 137                         | downstream of groEL; upstream of ydiM         | 635877                      | 2                                       | 0.0064                                                | 0.093                                                 |                                                              |                                                              |
| 138                         | inside yfml                                   | 803823                      | 2                                       | 0.0064                                                | 0.095                                                 |                                                              |                                                              |
| 139                         | inside ggaA                                   | 3649182                     | 4                                       | 0.0063                                                | 0.14                                                  |                                                              |                                                              |
| 140                         | inside ygaN                                   | 949113                      | 2                                       | 0.0061                                                | 0.15                                                  |                                                              |                                                              |
| 141                         | upstream of yubD; upstream of cdoA            | 3171744                     | 2                                       | 0.0061                                                | 0.098                                                 |                                                              |                                                              |
| 142                         | upstream of yvbW; downstream of yvbX          | 3469672                     | 2                                       | 0.0061                                                | 0.096                                                 |                                                              |                                                              |
| 143                         | inside glcT                                   | 1439894                     | 2                                       | 0.0060                                                | 0.10                                                  |                                                              |                                                              |
| 144                         | upstream of azlB; downstream of yrdF          | 2703111                     | 2                                       | 0.0060                                                | 0.11                                                  |                                                              |                                                              |
| 145                         | upstream of mmsA; upstream of iolR            | 4062626                     | 3                                       | 0.0060                                                | 0.10                                                  |                                                              |                                                              |
| 146                         | inside yomD                                   | 2235340                     | 5                                       | 0.0058                                                | 0.13                                                  |                                                              |                                                              |
| 147                         | inside ansB                                   | 2428074                     | 4                                       | 0.0057                                                | 0.14                                                  |                                                              |                                                              |
| 148                         | inside yoaU                                   | 2018593                     | 2                                       | 0.0057                                                | 0.097                                                 |                                                              |                                                              |
| 149                         | inside ntdB                                   | 1111160                     | 2                                       | 0.0057                                                | 0.14                                                  |                                                              |                                                              |
| 150                         | inside yrkN                                   | 2680299                     | 2                                       | 0.0056                                                | 0.12                                                  |                                                              |                                                              |
| 151                         | inside yrkA                                   | 2692074                     | 1                                       | 0.0056                                                | 0.11                                                  |                                                              |                                                              |
| 152                         | downstream of sbp; upstream of ftsA           | 1579864                     | 1                                       | 0.0056                                                | 0.070                                                 |                                                              |                                                              |
| 153                         | inside yddM                                   | 532774                      | 2                                       | 0.0056                                                | 0.047                                                 |                                                              |                                                              |
| 154                         | inside yomO                                   | 2217320                     | 4                                       | 0.0055                                                | 0.13                                                  |                                                              |                                                              |
| 155                         | inside yeeA                                   | 725278                      | 2                                       | 0.0055                                                | 0.11                                                  |                                                              |                                                              |
| 156                         | inside ytnJ                                   | 2980594                     | 1                                       | 0.0054                                                | 0.072                                                 |                                                              |                                                              |
| 157                         | inside queE                                   | 1424707                     | 3                                       | 0.0054                                                | 0.10                                                  |                                                              |                                                              |
| 158                         | upstream of yndM; upstream of fosB            | 1900185                     | 3                                       | 0.0054                                                | 0.096                                                 |                                                              |                                                              |
| 159                         | upstream of yxxF; downstream of yxiE          | 4009775                     | 3                                       | 0.0054                                                | 0.11                                                  |                                                              |                                                              |
| 160                         | inside putR                                   | 349481                      | 3                                       | 0.0054                                                | 0.066                                                 |                                                              |                                                              |
| 161                         | inside yonO                                   | 2195486                     | 1                                       | 0.0054                                                | 0.092                                                 |                                                              |                                                              |
| 162                         | inside yydD                                   | 4109616                     | 2                                       | 0.0054                                                | 0.030                                                 |                                                              |                                                              |
| 163                         | downstream of yddS; upstream of BSUB_00561    | 539638                      | 1                                       | 0.0053                                                | 0.12                                                  |                                                              |                                                              |
| 164                         | upstream of rrnB-16S; upstream of thiT        | 3156879                     | 2                                       | 0.0053                                                | 0.079                                                 |                                                              |                                                              |
| 165                         | upstream of ywnA; downstream of ureC          | 3744658                     | 3                                       | 0.0052                                                | 0.078                                                 |                                                              |                                                              |
| 166                         | downstream of exuR; upstream of uxaB          | 1293427                     | 2                                       | 0.0052                                                | 0.15                                                  |                                                              |                                                              |
| 167                         | upstream of yrzI; downstream of yrhG          | 2752096                     | 5                                       | 0.0052                                                | 0.093                                                 |                                                              |                                                              |
| 168                         | inside yoyD                                   | 2103058                     | 4                                       | 0.0052                                                | 0.13                                                  |                                                              |                                                              |

| peak<br>number <sup>1</sup> | nearby gene(s) <sup>2</sup>          | peak<br>summit <sup>3</sup> | number of<br>DnaA<br>boxes <sup>4</sup> | peak<br>amplitude at<br>1.4 $\mu$ M DnaA <sup>5</sup> | peak<br>amplitude at<br>4.1 $\mu$ M DnaA <sup>5</sup> | K <sub>d</sub> ( $\mu$ M)<br>(ATP-DnaA-<br>His) <sup>6</sup> | K <sub>d</sub> ( $\mu$ M)<br>(ADP-DnaA-<br>His) <sup>6</sup> |
|-----------------------------|--------------------------------------|-----------------------------|-----------------------------------------|-------------------------------------------------------|-------------------------------------------------------|--------------------------------------------------------------|--------------------------------------------------------------|
| 169                         | inside bpr                           | 1585389                     | 2                                       | 0.0052                                                | 0.060                                                 |                                                              |                                                              |
| 170                         | upstream of yugI; downstream of yugH | 3203712                     | 2                                       | 0.0052                                                | 0.14                                                  |                                                              |                                                              |
| 171                         | inside yvgL                          | 3403906                     | 3                                       | 0.0052                                                | 0.14                                                  |                                                              |                                                              |
| 172                         | downstream of ykuV; upstream of rok  | 1477265                     | 3                                       | 0.0052                                                | 0.067                                                 |                                                              |                                                              |
| 173                         | inside yybK                          | 4153513                     | 2                                       | 0.0052                                                | 0.072                                                 |                                                              |                                                              |
| 174                         | inside ywqJ                          | 3703705                     | 2                                       | 0.0051                                                | 0.17                                                  |                                                              |                                                              |
| 175                         | upstream of qoxA; upstream of ywzA   | 3896457                     | 2                                       | 0.0051                                                | 0.059                                                 |                                                              |                                                              |
| 176                         | inside mcpC                          | 1449127                     | 2                                       | 0.0050                                                | 0.076                                                 |                                                              |                                                              |
| 177                         | upstream of yhcQ; upstream of yhcR   | 974951                      | 2                                       | 0.0050                                                | 0.075                                                 |                                                              |                                                              |
| 178                         | downstream of amyE; upstream of ldh  | 329762                      | 5                                       | 0.0050                                                | 0.093                                                 |                                                              |                                                              |
| 179                         | inside coaD                          | 1553779                     | 2                                       | 0.0049                                                | 0.12                                                  |                                                              |                                                              |
| 180                         | inside speE                          | 3827051                     | 3                                       | 0.0049                                                | 0.11                                                  |                                                              |                                                              |
| 181                         | inside nrdEB                         | 2136036                     | 5                                       | 0.0049                                                | 0.11                                                  |                                                              |                                                              |
| 182                         | inside aldY                          | 3965319                     | 3                                       | 0.0048                                                | 0.12                                                  |                                                              |                                                              |
| 183                         | upstream of trpE; downstream of aroH | 2350371                     | 1                                       | 0.0048                                                | 0.11                                                  |                                                              |                                                              |
| 184                         | inside kinC                          | 1502031                     | 3                                       | 0.0048                                                | 0.097                                                 |                                                              |                                                              |
| 185                         | inside yxel                          | 4041561                     | 3                                       | 0.0048                                                | 0.12                                                  |                                                              |                                                              |
| 186                         | inside ylaJ                          | 1532826                     | 3                                       | 0.0048                                                | 0.098                                                 |                                                              |                                                              |
| 187                         | inside yosU                          | 2131253                     | 3                                       | 0.0048                                                | 0.088                                                 |                                                              |                                                              |
| 188                         | upstream of bdhA; upstream of ydjM   | 662926                      | 3                                       | 0.0048                                                | 0.069                                                 |                                                              |                                                              |
| 189                         | upstream of yvaK; downstream of secG | 3433048                     | 2                                       | 0.0047                                                | 0.050                                                 |                                                              |                                                              |
| 190                         | inside cwIP                          | 2225901                     | 2                                       | 0.0047                                                | 0.11                                                  |                                                              |                                                              |
| 191                         | upstream of trxB; downstream of cwIO | 3552343                     | 3                                       | 0.0047                                                | 0.12                                                  |                                                              |                                                              |
| 192                         | inside sunS                          | 2238728                     | 1                                       | 0.0047                                                | 0.065                                                 |                                                              |                                                              |
| 193                         | upstream of katA; upstream of ssuB   | 944689                      | 1                                       | 0.0047                                                | 0.068                                                 |                                                              |                                                              |
| 194                         | inside paiB                          | 3282447                     | 1                                       | 0.0046                                                | 0.13                                                  |                                                              |                                                              |
| 195                         | inside uxaB                          | 1293996                     | 2                                       | 0.0046                                                | 0.16                                                  |                                                              |                                                              |
| 196                         | inside yokG                          | 2252170                     | 3                                       | 0.0046                                                | 0.10                                                  |                                                              |                                                              |
| 197                         | inside xkdV                          | 1326957                     | 4                                       | 0.0046                                                | 0.10                                                  |                                                              |                                                              |
| 198                         | inside cotH                          | 3694449                     | 3                                       | 0.0046                                                | 0.17                                                  |                                                              |                                                              |
| 199                         | inside yvrG                          | 3386160                     | 2                                       | 0.0046                                                | 0.10                                                  |                                                              |                                                              |
| 200                         | inside yxxG                          | 4001361                     | 3                                       | 0.0046                                                | 0.089                                                 |                                                              |                                                              |
| 201                         | upstream of yonX; downstream of yonV | 2190425                     | 2                                       | 0.0045                                                | 0.074                                                 |                                                              |                                                              |
| 202                         | upstream of cotU; upstream of thyA   | 1885553                     | 3                                       | 0.0045                                                | 0.11                                                  |                                                              |                                                              |
| 203                         | upstream of ppsA; downstream of dacC | 1970880                     | 2                                       | 0.0045                                                | 0.034                                                 |                                                              |                                                              |
| 204                         | inside yqfL                          | 2576950                     | 3                                       | 0.0045                                                | 0.096                                                 |                                                              |                                                              |
| 205                         | inside immA                          | 514275                      | 2                                       | 0.0045                                                | 0.069                                                 |                                                              |                                                              |
| 206                         | downstream of yjcS; upstream of yjdA | 1252152                     | 2                                       | 0.0045                                                | 0.083                                                 |                                                              |                                                              |
| 207                         | inside asnB                          | 3104302                     | 2                                       | 0.0044                                                | 0.071                                                 |                                                              |                                                              |
| 208                         | inside sunT                          | 2241620                     | 2                                       | 0.0044                                                | 0.065                                                 |                                                              |                                                              |
| 209                         | upstream of ykva; upstream of spo0E  | 1414175                     | 2                                       | 0.0044                                                | 0.070                                                 |                                                              |                                                              |
| 210                         | upstream of dinB; upstream of ydgG   | 592390                      | 5                                       | 0.0044                                                | 0.13                                                  |                                                              |                                                              |
| 211                         | upstream of yorM; downstream of yorL | 2148355                     | 3                                       | 0.0043                                                | 0.079                                                 |                                                              |                                                              |
| 212                         | inside yxkI                          | 3959970                     | 2                                       | 0.0043                                                | 0.076                                                 |                                                              |                                                              |
| 213                         | upstream of artP; downstream of yqiW | 2465792                     | 3                                       | 0.0043                                                | 0.093                                                 |                                                              |                                                              |
| 214                         | inside yonO                          | 2197769                     | 2                                       | 0.0043                                                | 0.11                                                  |                                                              |                                                              |
| 215                         | upstream of immR; upstream of xis    | 515238                      | 3                                       | 0.0043                                                | 0.028                                                 |                                                              |                                                              |
| 216                         | inside yrdR                          | 2693590                     | 3                                       | 0.0042                                                | 0.073                                                 |                                                              |                                                              |
| 217                         | upstream of cydA; upstream of cimH   | 3957253                     | 3                                       | 0.0042                                                | 0.063                                                 |                                                              |                                                              |
| 218                         | inside yjcM                          | 1248087                     | 4                                       | 0.0042                                                | 0.062                                                 |                                                              |                                                              |
| 219                         | inside nrdE                          | 1854429                     | 2                                       | 0.0041                                                | 0.14                                                  |                                                              |                                                              |
| 220                         | upstream of ackA; downstream of ytxK | 2994356                     | 4                                       | 0.0041                                                | 0.072                                                 |                                                              |                                                              |
| 221                         | inside BSUB_01899                    | 1884325                     | 2                                       | 0.0041                                                | 0.075                                                 |                                                              |                                                              |
| 222                         | downstream of fadH; upstream of fadG | 1462449                     | 2                                       | 0.0041                                                | 0.090                                                 |                                                              |                                                              |
| 223                         | inside yoyI                          | 2185822                     | 2                                       | 0.0041                                                | 0.056                                                 |                                                              |                                                              |
| 224                         | upstream of yokH; downstream of yokG | 2250928                     | 2                                       | 0.0041                                                | 0.065                                                 |                                                              |                                                              |

| peak<br>number <sup>1</sup> | nearby gene(s) <sup>2</sup>              | peak<br>summit <sup>3</sup> | number of<br>DnaA<br>boxes <sup>4</sup> | peak<br>amplitude at<br>1.4 $\mu$ M DnaA <sup>5</sup> | peak<br>amplitude at<br>4.1 $\mu$ M DnaA <sup>5</sup> | K <sub>d</sub> ( $\mu$ M)<br>(ATP-DnaA-<br>His) <sup>6</sup> | K <sub>d</sub> ( $\mu$ M)<br>(ADP-DnaA-<br>His) <sup>6</sup> |
|-----------------------------|------------------------------------------|-----------------------------|-----------------------------------------|-------------------------------------------------------|-------------------------------------------------------|--------------------------------------------------------------|--------------------------------------------------------------|
| 225                         | downstream of appC; upstream of yjbA     | 1200835                     | 3                                       | 0.0041                                                | 0.11                                                  |                                                              |                                                              |
| 226                         | inside ykuH                              | 1465117                     | 3                                       | 0.0041                                                | 0.040                                                 |                                                              |                                                              |
| 227                         | downstream of frr; upstream of uppS      | 1704653                     | 2                                       | 0.0041                                                | 0.051                                                 |                                                              |                                                              |
| 228                         | upstream of sdpr; downstream of opuCD    | 3445492                     | 1                                       | 0.0041                                                | 0.028                                                 |                                                              |                                                              |
| 229                         | inside xkdK                              | 1316997                     | 3                                       | 0.0040                                                | 0.090                                                 |                                                              |                                                              |
| 230                         | inside ygzC                              | 938286                      | 1                                       | 0.0040                                                | 0.093                                                 |                                                              |                                                              |
| 231                         | inside BSUB_03076                        | 2926317                     | 3                                       | 0.0040                                                | 0.13                                                  |                                                              |                                                              |
| 232                         | inside gltR                              | 2698613                     | 1                                       | 0.0040                                                | 0.059                                                 |                                                              |                                                              |
| 233                         | downstream of ykvO; upstream of ykvP     | 1427359                     | 2                                       | 0.0040                                                | 0.098                                                 |                                                              |                                                              |
| 234                         | downstream of bofA; upstream of rrnA-16S | 30230                       | 1                                       | 0.0039                                                | 0.058                                                 |                                                              |                                                              |
| 235                         | inside ypfD                              | 2367960                     | 4                                       | 0.0039                                                | 0.13                                                  |                                                              |                                                              |
| 236                         | inside yomR                              | 2215348                     | 1                                       | 0.0039                                                | 0.075                                                 |                                                              |                                                              |
| 237                         | inside mtIA                              | 451069                      | 2                                       | 0.0039                                                | 0.11                                                  |                                                              |                                                              |
| 238                         | downstream of prkA; upstream of yhbH     | 958682                      | 1                                       | 0.0039                                                | 0.038                                                 |                                                              |                                                              |
| 239                         | inside yorJ                              | 2154951                     | 2                                       | 0.0039                                                | 0.11                                                  |                                                              |                                                              |
| 240                         | upstream of trpS; upstream of oppA       | 1203242                     | 2                                       | 0.0039                                                | 0.019                                                 |                                                              |                                                              |
| 241                         | upstream of sunA; downstream of sunI     | 2242579                     | 1                                       | 0.0039                                                | 0.019                                                 |                                                              |                                                              |
| 242                         | inside yqaP                              | 2664910                     | 2                                       | 0.0038                                                | 0.066                                                 |                                                              |                                                              |
| 243                         | inside yqxI                              | 2637135                     | 1                                       | 0.0038                                                | 0.047                                                 |                                                              |                                                              |
| 244                         | inside yfmG                              | 805867                      | 1                                       | 0.0038                                                | 0.059                                                 |                                                              |                                                              |
| 245                         | inside pksR                              | 1840366                     | 3                                       | 0.0037                                                | 0.066                                                 |                                                              |                                                              |
| 246                         | inside spoIVFA                           | 2829713                     | 3                                       | 0.0037                                                | 0.062                                                 |                                                              |                                                              |
| 247                         | inside menE                              | 3126505                     | 4                                       | 0.0037                                                | 0.086                                                 |                                                              |                                                              |
| 248                         | downstream of ffh; upstream of rpsP      | 1657118                     | 3                                       | 0.0037                                                | 0.038                                                 |                                                              |                                                              |
| 249                         | inside yotJ                              | 2126323                     | 1                                       | 0.0037                                                | 0.088                                                 |                                                              |                                                              |
| 250                         | inside ydiO                              | 639141                      | 3                                       | 0.0037                                                | 0.11                                                  |                                                              |                                                              |
| 251                         | downstream of rsbX; upstream of ydcF     | 507944                      | 1                                       | 0.0037                                                | 0.12                                                  |                                                              |                                                              |
| 252                         | inside bceB                              | 3087927                     | 3                                       | 0.0037                                                | 0.088                                                 |                                                              |                                                              |
| 253                         | upstream of yyaR; upstream of yyaQ       | 4163988                     | 5                                       | 0.0037                                                | 0.11                                                  |                                                              |                                                              |
| 254                         | inside ugtP                              | 2279297                     | 2                                       | 0.0037                                                | 0.081                                                 |                                                              |                                                              |
| 255                         | inside uvrX                              | 2244022                     | 2                                       | 0.0036                                                | 0.076                                                 |                                                              |                                                              |
| 256                         | upstream of odhA; downstream of yojO     | 2084477                     | 2                                       | 0.0036                                                | 0.061                                                 |                                                              |                                                              |
| 257                         | inside yqaP                              | 2664545                     | 3                                       | 0.0036                                                | 0.071                                                 |                                                              |                                                              |
| 258                         | upstream of yocI; downstream of yocJ     | 2068958                     | 3                                       | 0.0036                                                | 0.055                                                 |                                                              |                                                              |
| 259                         | inside yopA                              | 2189076                     | 4                                       | 0.0036                                                | 0.062                                                 |                                                              |                                                              |
| 260                         | inside ywqM                              | 3701693                     | 2                                       | 0.0036                                                | 0.11                                                  |                                                              |                                                              |
| 261                         | inside nasF                              | 353939                      | 1                                       | 0.0035                                                | 0.11                                                  |                                                              |                                                              |
| 262                         | inside araA                              | 2921372                     | 2                                       | 0.0034                                                | 0.091                                                 |                                                              |                                                              |
| 263                         | inside mtbP                              | 2145278                     | 1                                       | 0.0033                                                | 0.081                                                 |                                                              |                                                              |
| 264                         | inside ydcl                              | 511301                      | 2                                       | 0.0032                                                | 0.092                                                 |                                                              |                                                              |
| 265                         | inside ybfB                              | 237087                      | 2                                       | 0.0032                                                | 0.087                                                 |                                                              |                                                              |
| 266                         | inside yvqJ                              | 3377365                     | 2                                       | 0.0031                                                | 0.062                                                 |                                                              |                                                              |
| 267                         | upstream of ctaA; upstream of ctaB       | 1542613                     | 3                                       | 0.0030                                                | 0.038                                                 |                                                              |                                                              |
| 268                         | inside yokF                              | 2252962                     | 2                                       | 0.0030                                                | 0.097                                                 |                                                              |                                                              |
| 269                         | inside BSUB_01910                        | 1890933                     | 1                                       | 0.0030                                                | 0.049                                                 |                                                              |                                                              |
